# Supplementary material for: Expedient synthesis of an α-S-(1→6)-linked pentaglucosyl thiol
Source: Royal Society of Chemistry journal article supplement (doi:10.1039/c4ob01094a), 2014-01-01

## Supplementary Information

### Expedient Synthesis of $\alpha$ -S-(1 $\rightarrow$ 6)-Linked Pentaglucoyl Thiol

Huali Wang<sup>a</sup> and Xiangming Zhu<sup>\*a,b</sup>

<sup>a</sup>*College of Chemistry and Life Sciences, Zhejiang Normal University, Jinhua 321004, China*

<sup>b</sup>*Centre for Synthesis and Chemical Biology, UCD School of Chemistry and Chemical Biology, University College Dublin, Belfield, Dublin 4, Ireland*

Tel: +353 17162386; Fax: +353 17162501; e-mail: [Xiangming.Zhu@ucd.ie](mailto:Xiangming.Zhu@ucd.ie)

### Table of Contents

|                                                                  |     |
|------------------------------------------------------------------|-----|
| <sup>1</sup> H and <sup>13</sup> C spectra of compound <b>10</b> | S2  |
| <sup>1</sup> H and <sup>13</sup> C spectra of compound <b>7</b>  | S3  |
| <sup>1</sup> H and <sup>13</sup> C spectra of compound <b>11</b> | S4  |
| <sup>1</sup> H and <sup>13</sup> C spectra of compound <b>12</b> | S5  |
| <sup>1</sup> H and <sup>13</sup> C spectra of compound <b>13</b> | S6  |
| <sup>1</sup> H and <sup>13</sup> C spectra of compound <b>5</b>  | S7  |
| <sup>1</sup> H and <sup>13</sup> C spectra of compound <b>14</b> | S8  |
| <sup>1</sup> H and <sup>13</sup> C spectra of compound <b>4</b>  | S9  |
| <sup>1</sup> H and <sup>13</sup> C spectra of compound <b>15</b> | S10 |
| <sup>1</sup> H and <sup>13</sup> C spectra of compound <b>2</b>  | S11 |
| <sup>1</sup> H and <sup>13</sup> C spectra of compound <b>6</b>  | S12 |
| <sup>1</sup> H and <sup>13</sup> C spectra of compound <b>16</b> | S13 |
| <sup>1</sup> H and <sup>13</sup> C spectra of compound <b>3</b>  | S14 |
| <sup>1</sup> H and <sup>13</sup> C spectra of compound <b>17</b> | S15 |
| <sup>1</sup> H and <sup>13</sup> C spectra of compound <b>1</b>  | S16 |

# <sup>1</sup>H NMR and <sup>13</sup>C NMR spectra of compound 10

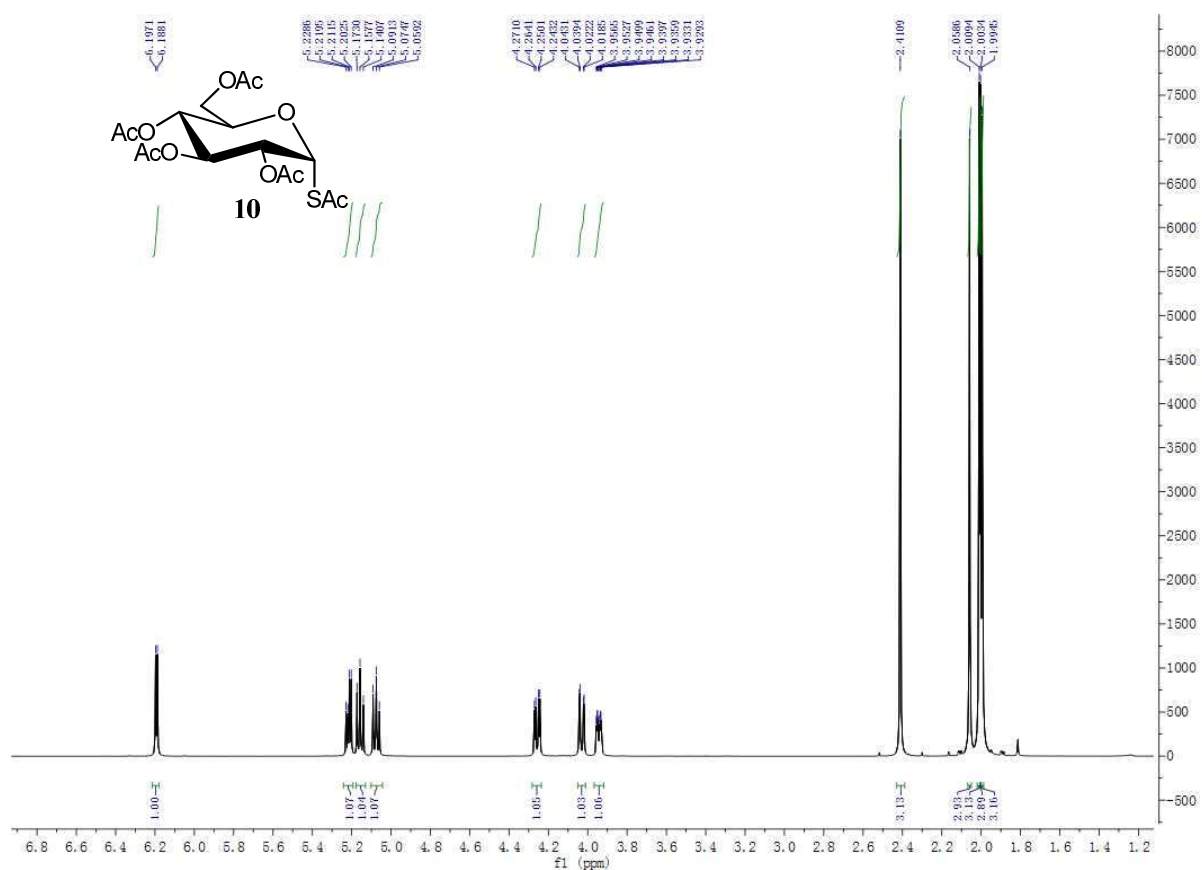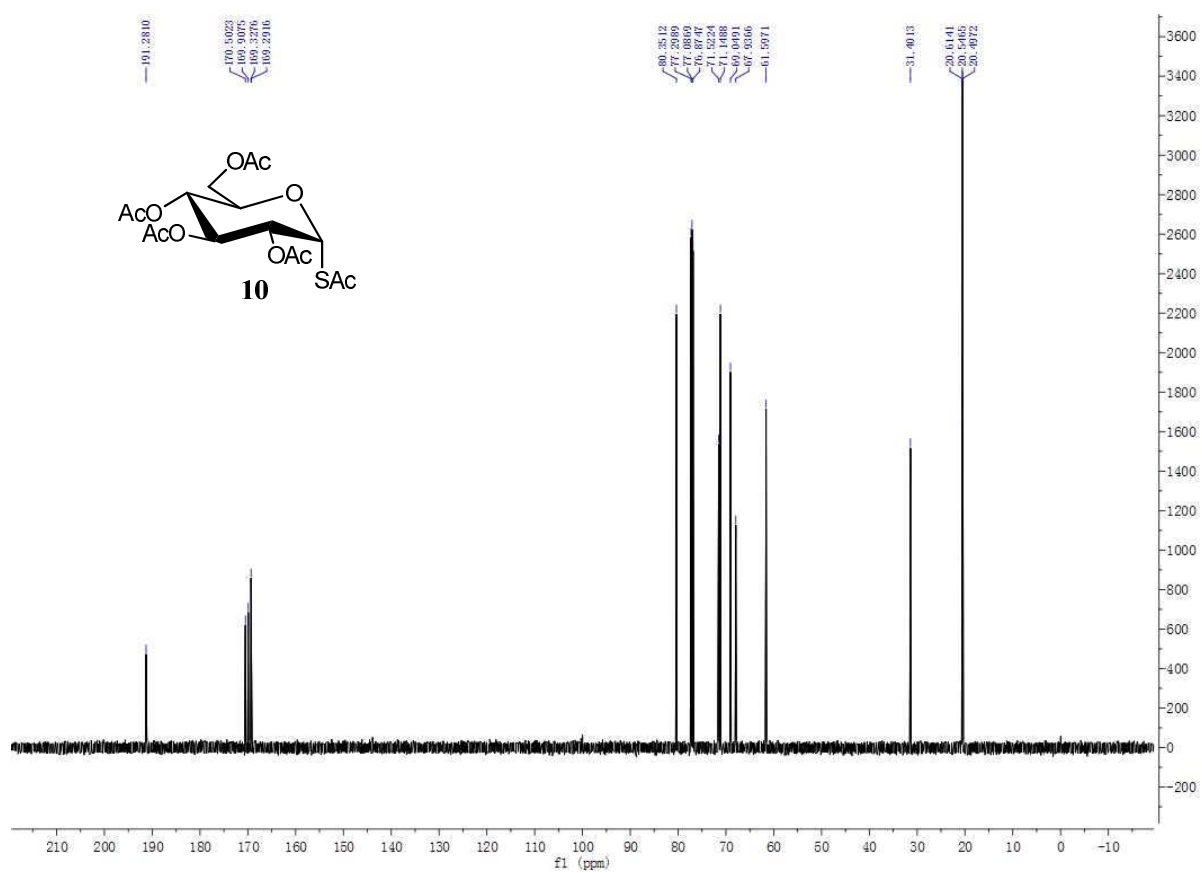

# <sup>1</sup>H NMR and <sup>13</sup>C NMR spectra of compound 7

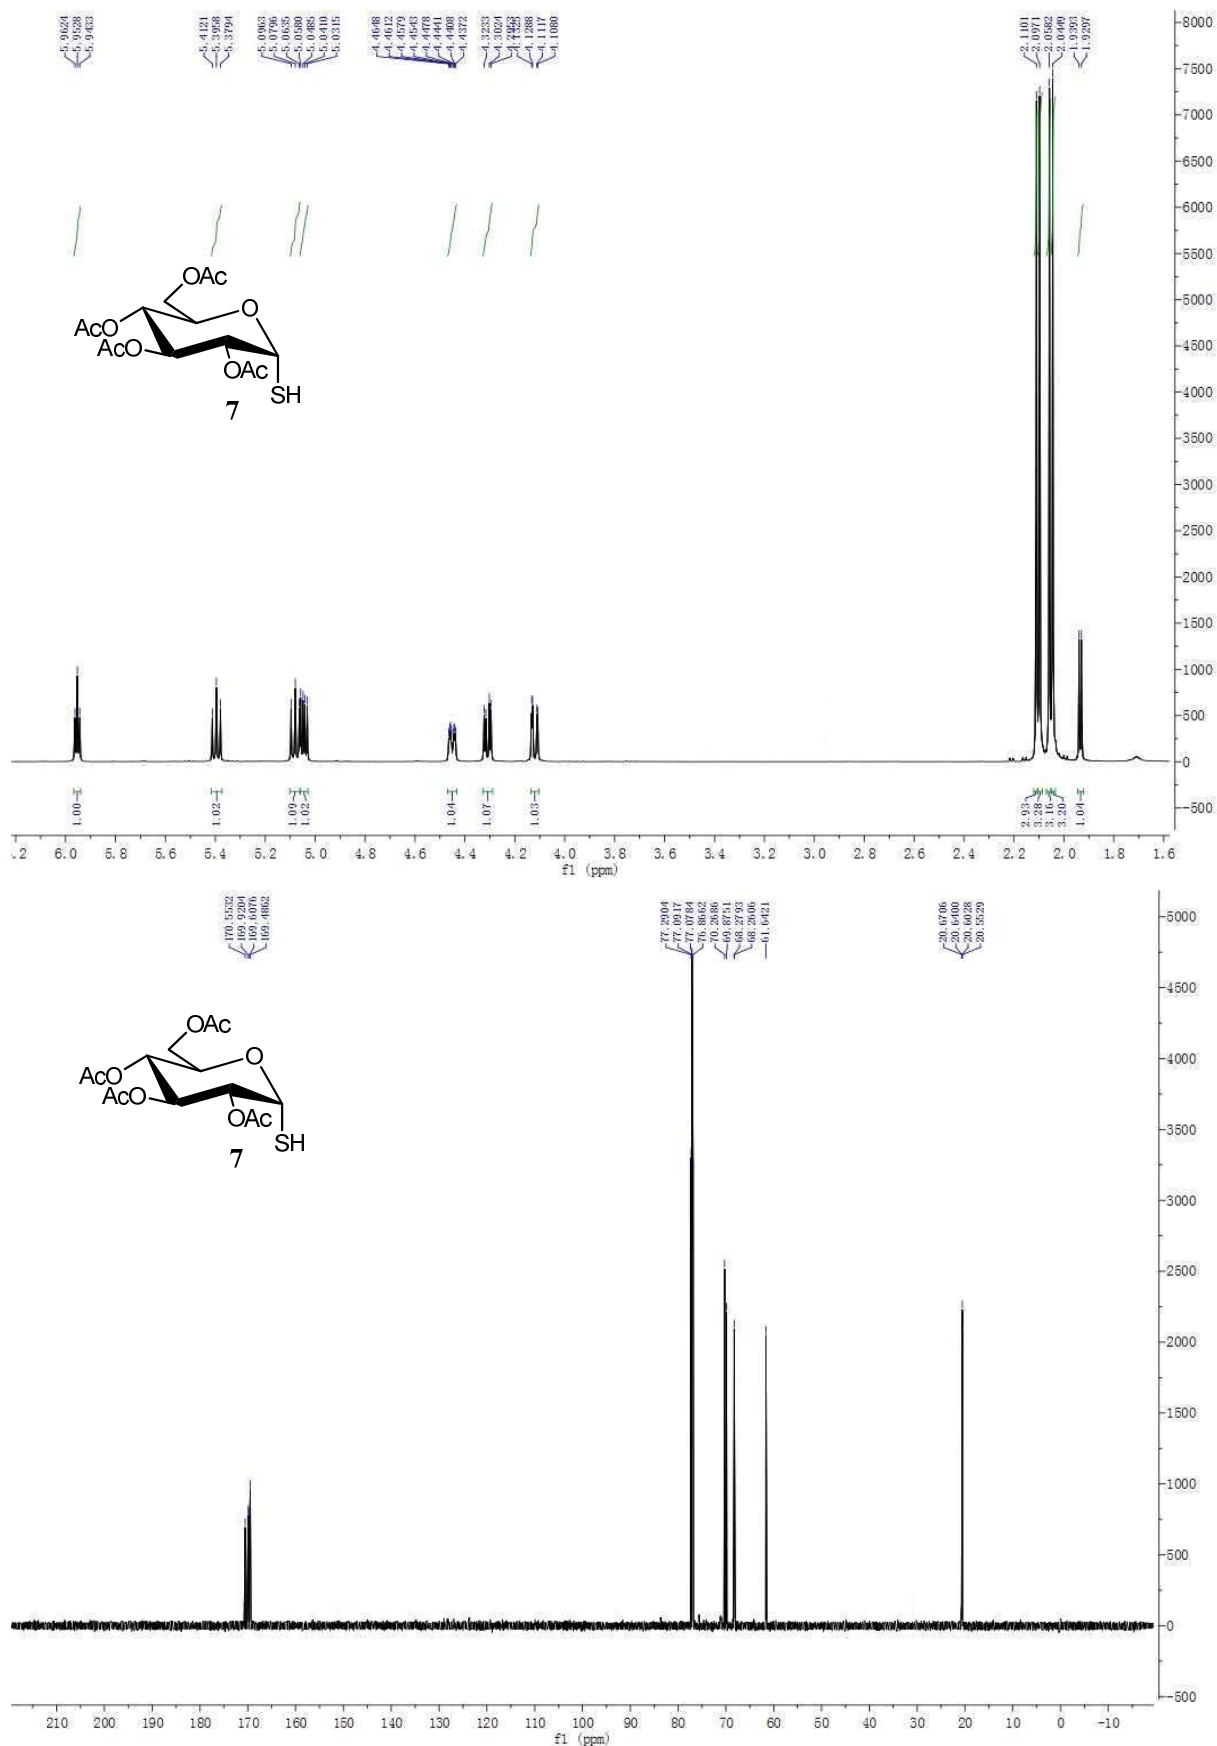

# <sup>1</sup>H NMR and <sup>13</sup>C NMR spectra of compound 11

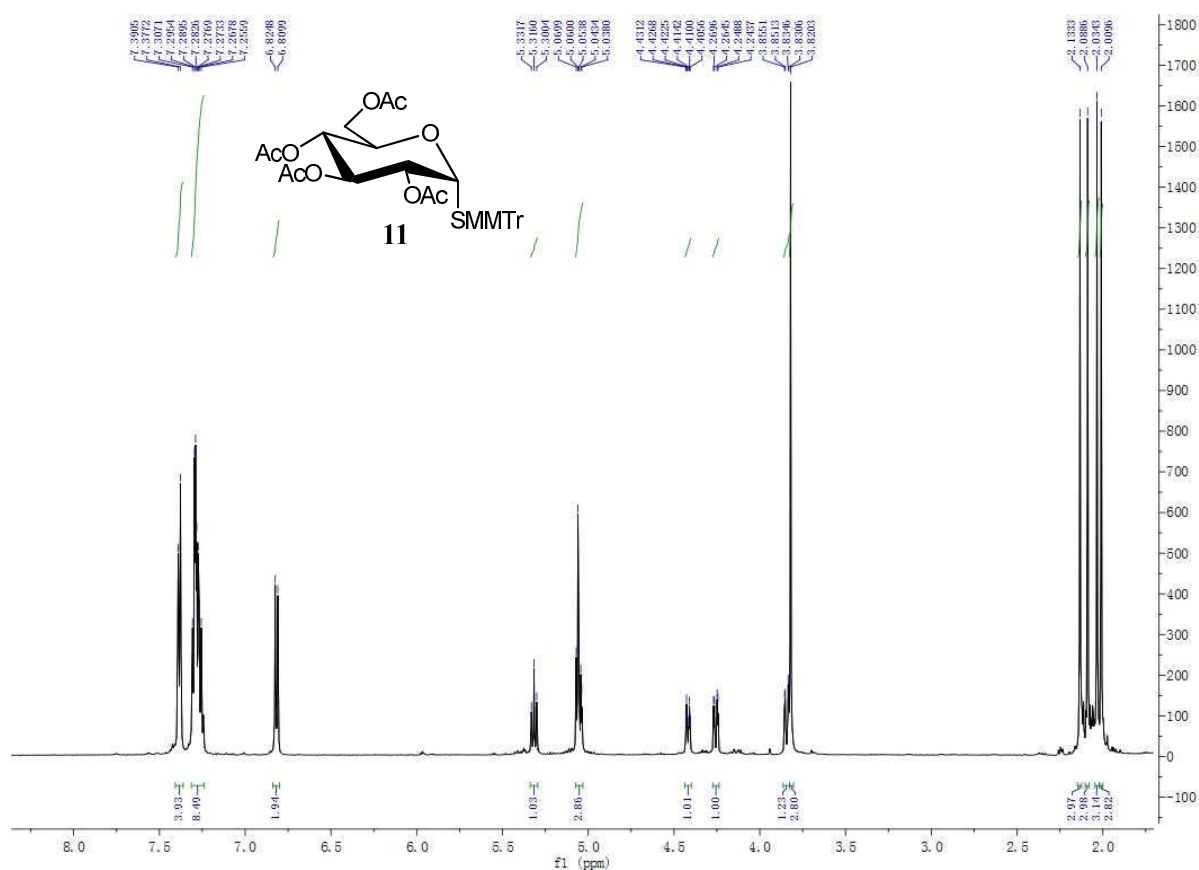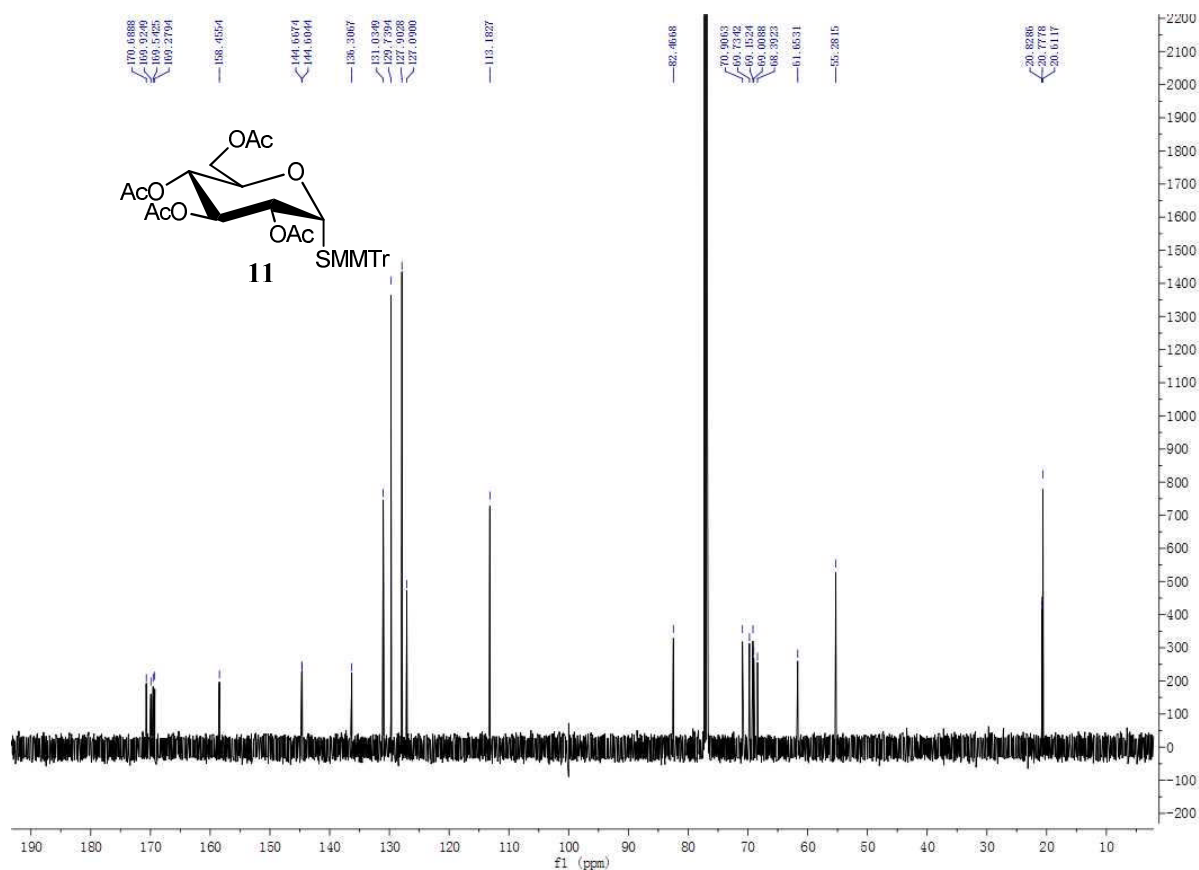

# <sup>1</sup>H NMR and <sup>13</sup>C NMR spectra of compound 12

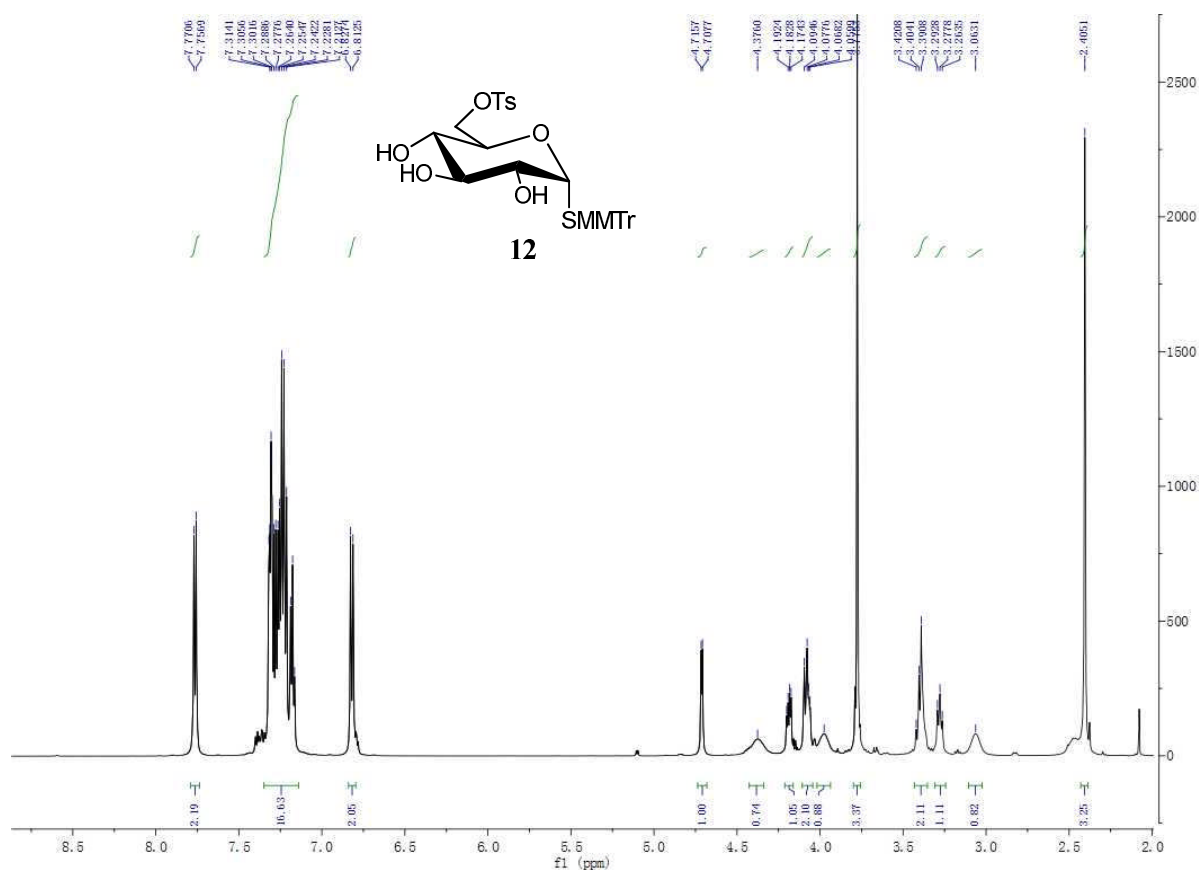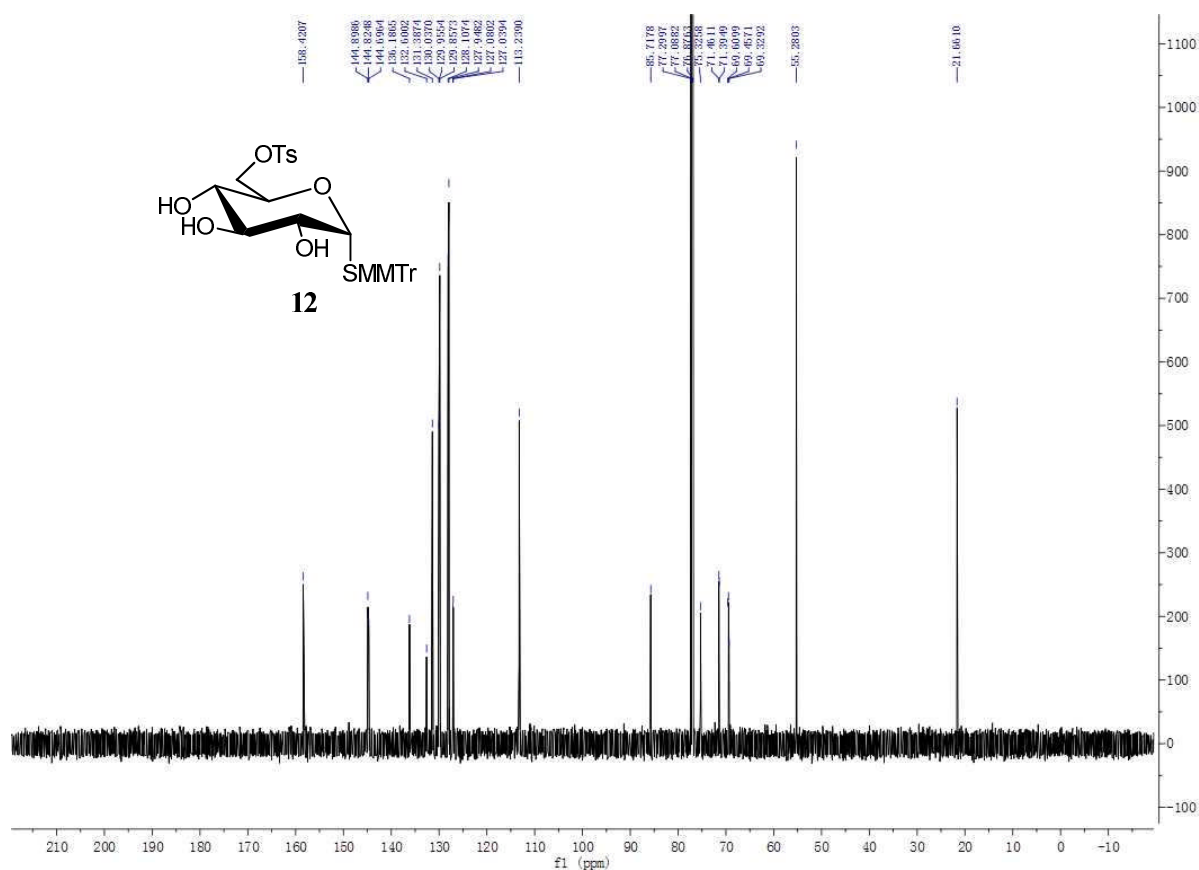

# <sup>1</sup>H NMR and <sup>13</sup>C NMR spectra of compound 13

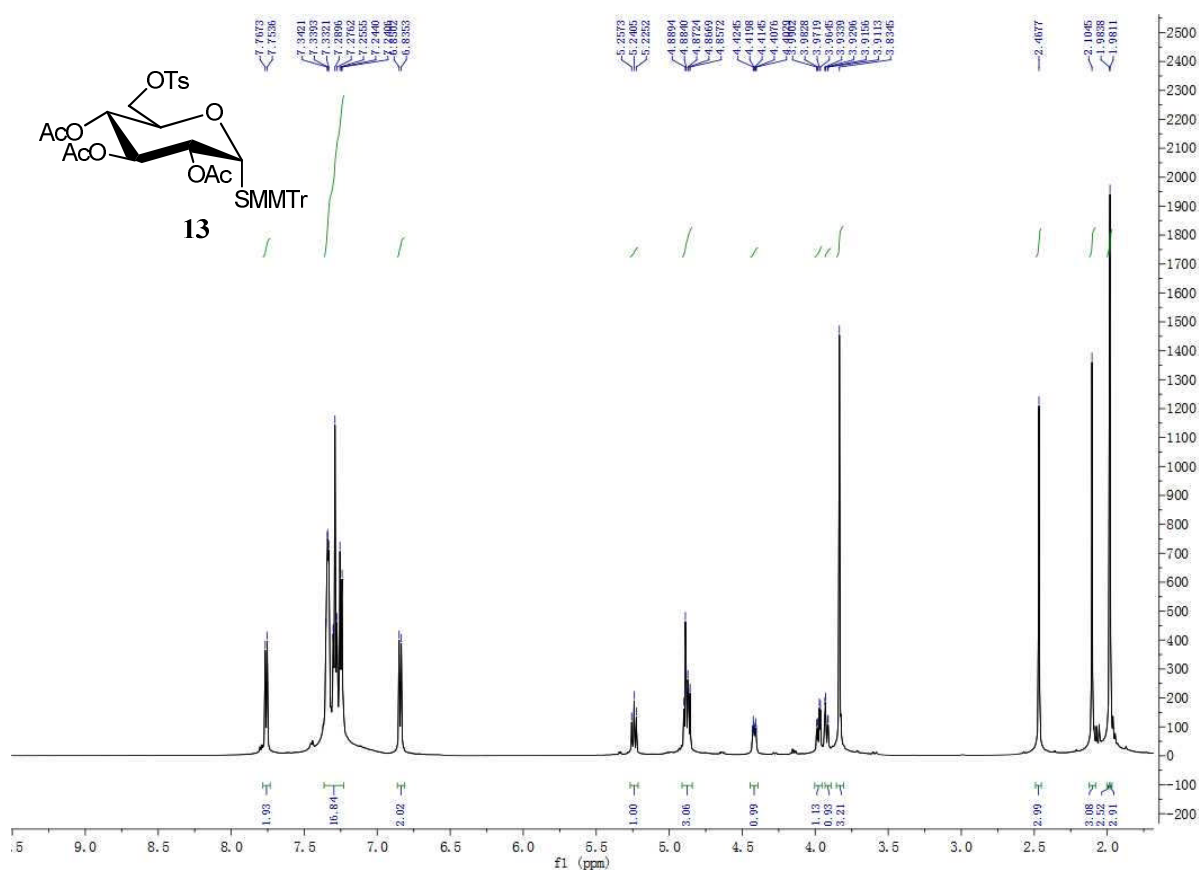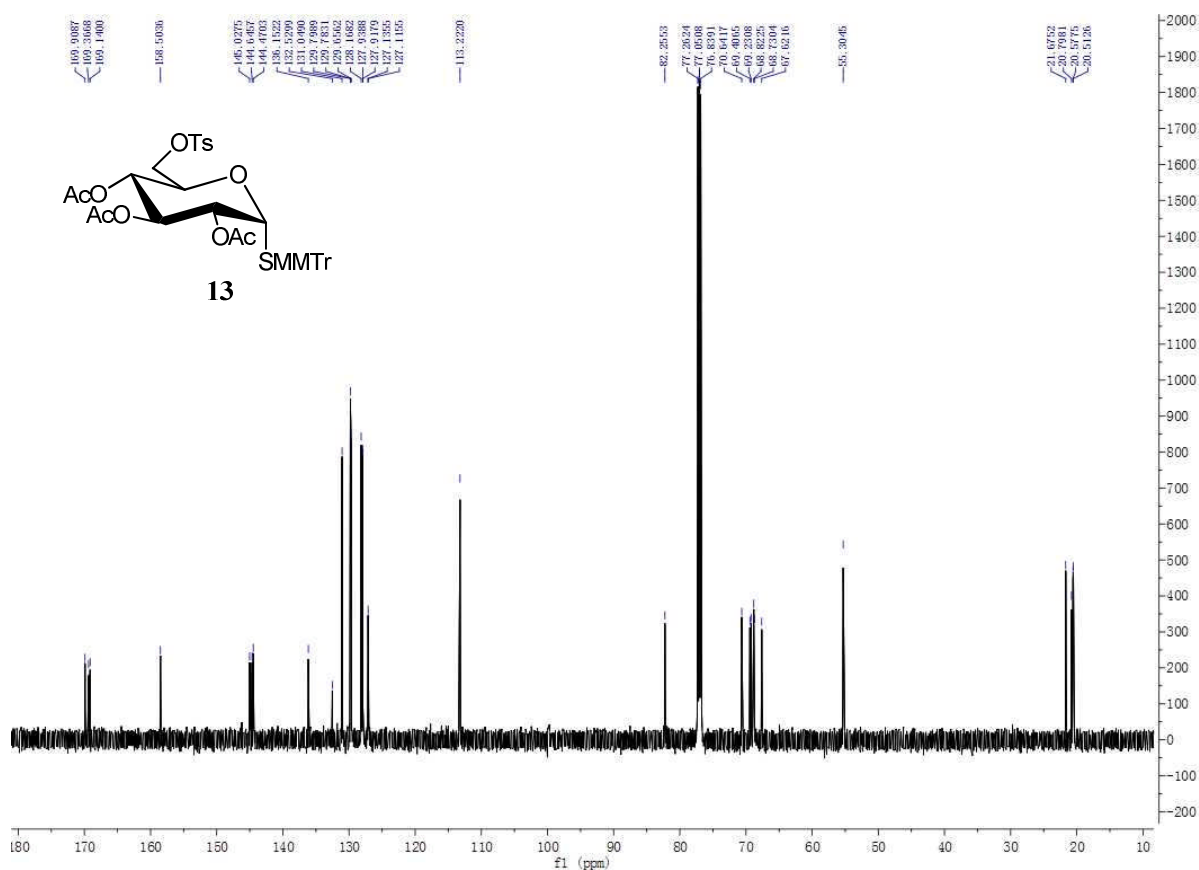

**Chemical structure of compound 5:**

CCOC(=O)[C@H]1[C@@H](OC(=O)C)[C@H](I)[C@@H](OC(=O)C)[C@H]1OC(=O)C

**<sup>1</sup>H NMR spectrum (CDCl<sub>3</sub>):**

| Chemical Shift (ppm)                                                                           | Integration            |
|------------------------------------------------------------------------------------------------|------------------------|
| 7.4380, 7.4128, 7.3160, 7.3027, 7.2858, 7.2684, 7.2561                                         | 4.47, 9.18             |
| 6.8325, 6.8187                                                                                 | 2.06                   |
| 5.3520, 5.3271, 5.3244, 5.3196, 5.1154, 5.1059, 5.0531, 5.0222, 5.0255, 4.9259, 4.9245, 4.9070 | 1.00, 0.98, 1.02, 1.01 |
| 3.9187, 3.9131, 3.9074, 3.8971, 3.8914, 3.8220                                                 | 1.11, 3.01             |
| 3.1159, 3.1105, 3.0972, 3.0919, 3.0865, 3.0787, 3.0722, 3.0661                                 | 1.64, 3.39             |
| 2.1540, 2.0537, 2.0411                                                                         | 3.01, 3.07, 3.05       |

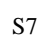

# <sup>1</sup>H NMR and <sup>13</sup>C NMR spectra of compound 14

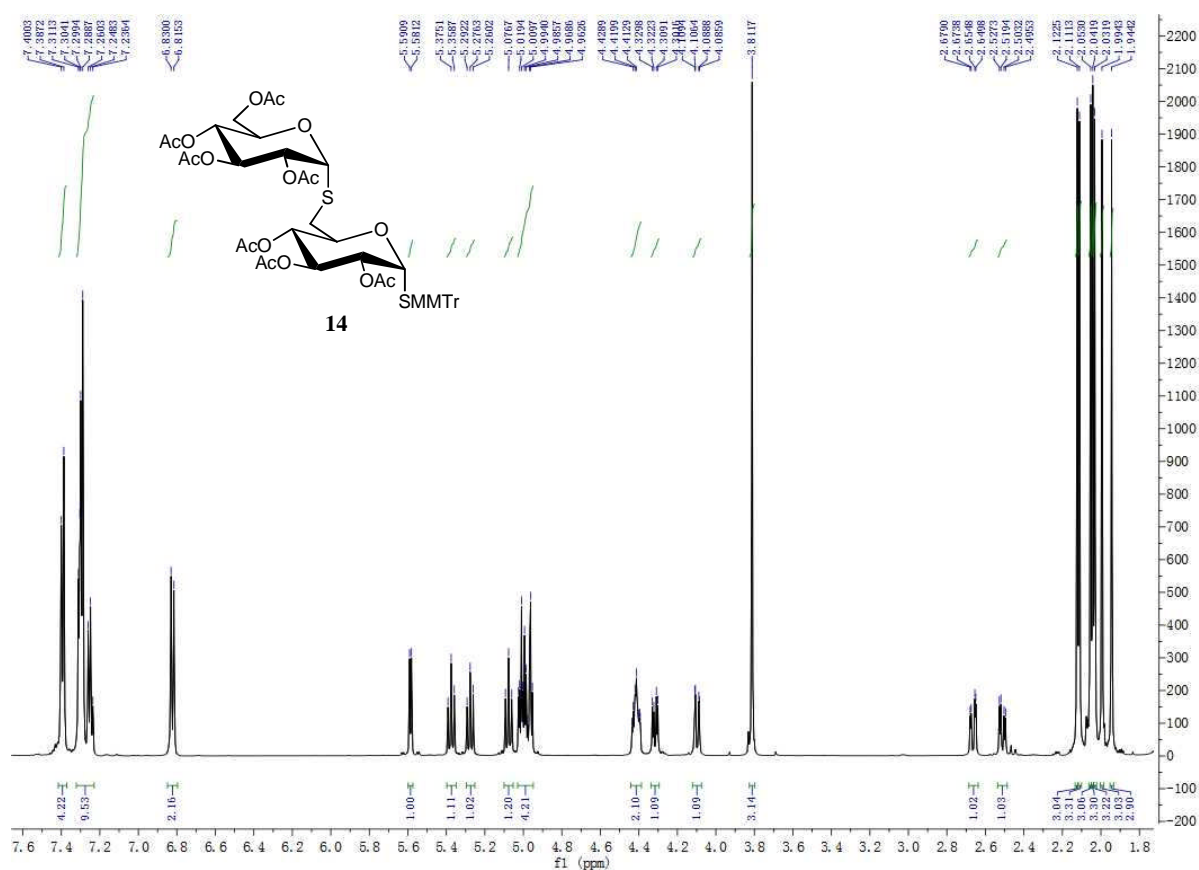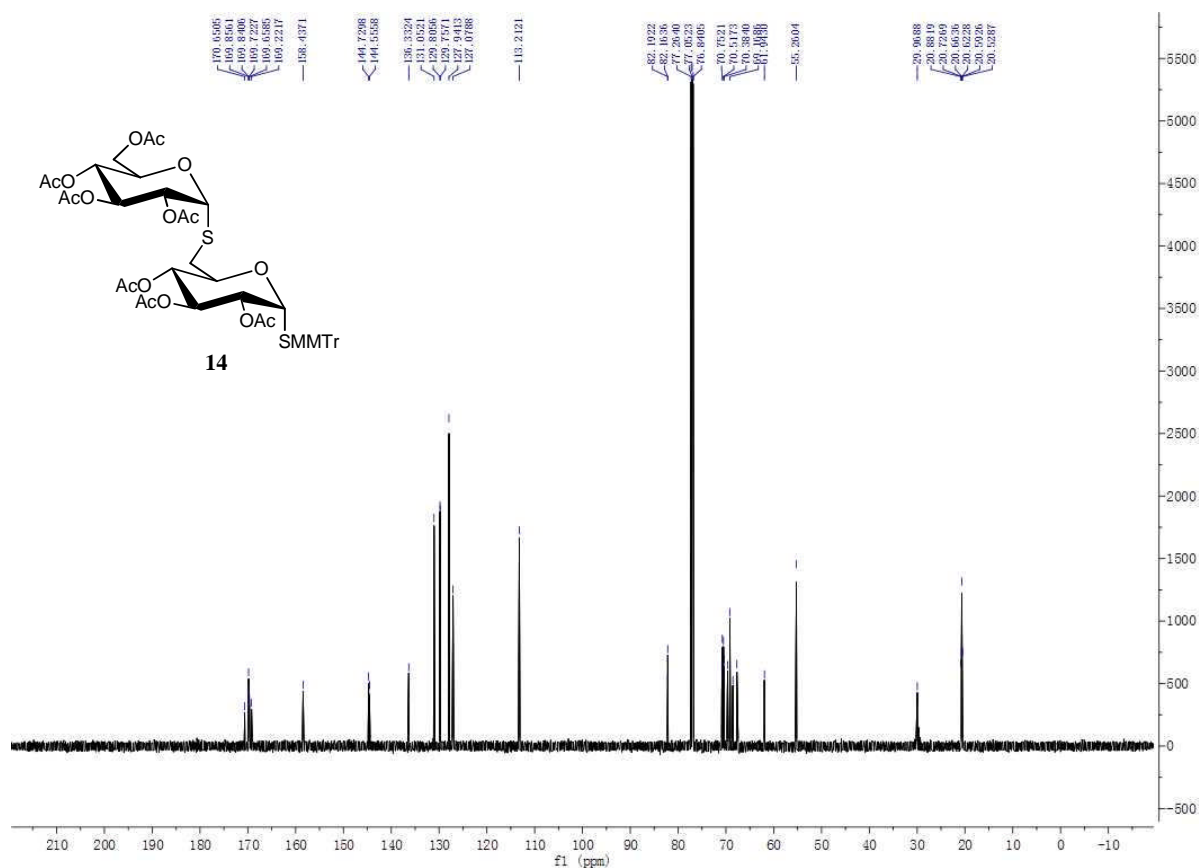



# <sup>1</sup>H NMR and <sup>13</sup>C NMR spectra of compound 4

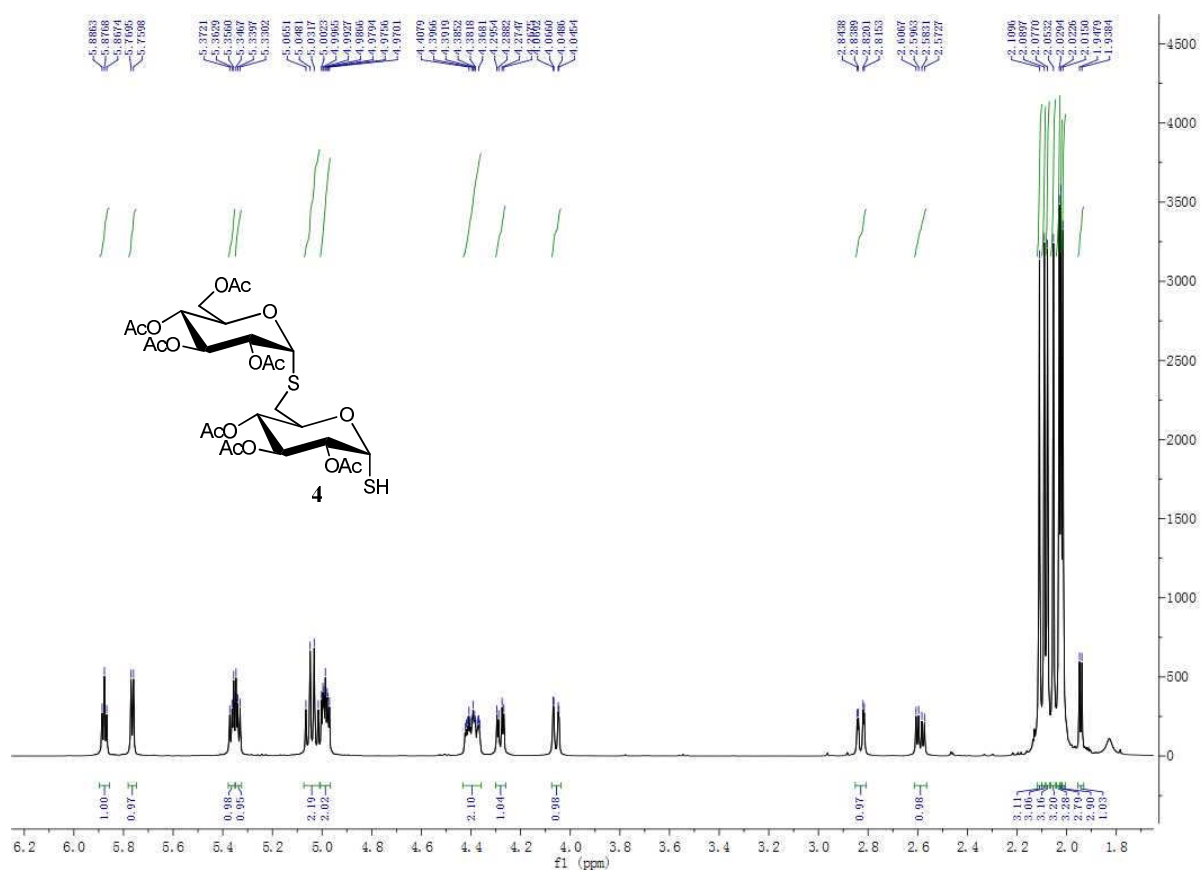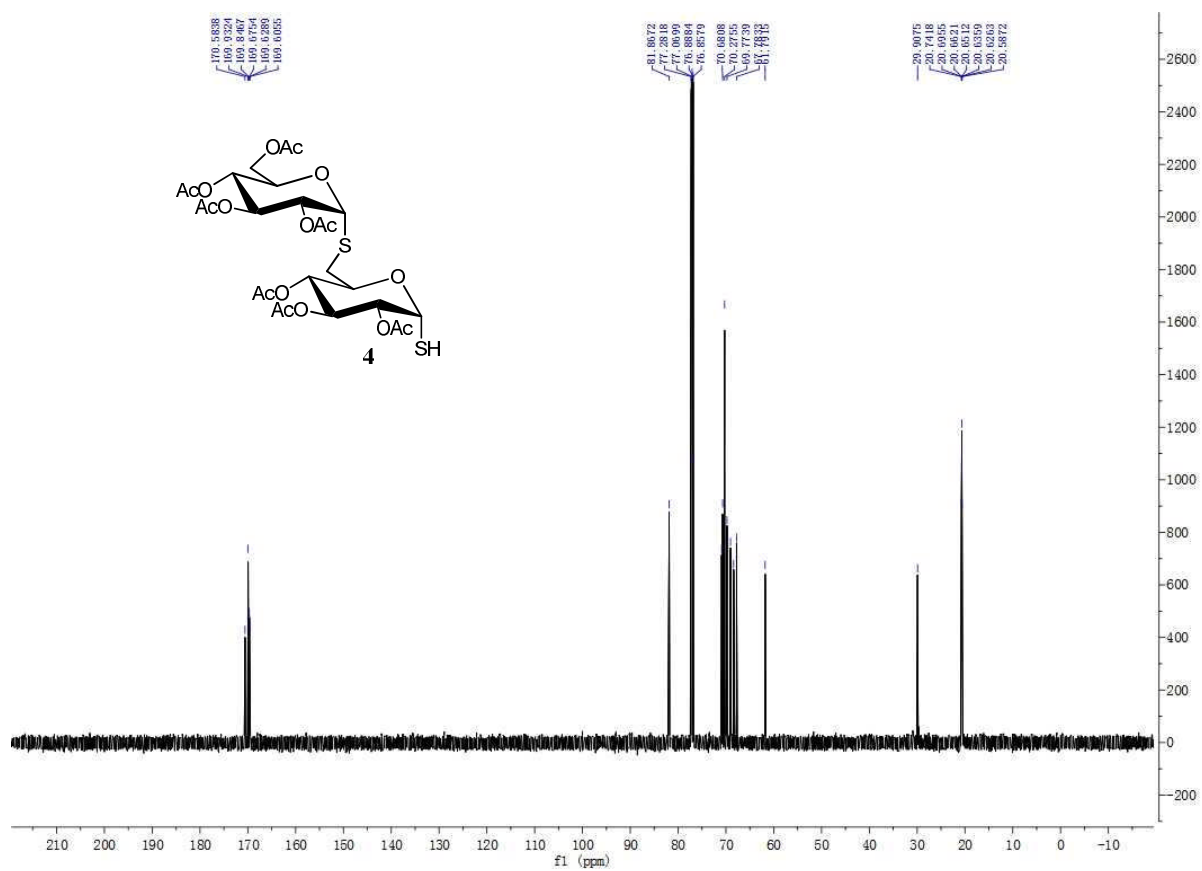

Chemical structure of compound **15** is shown above the spectrum. The structure is a branched trisaccharide consisting of three glucose units linked by (1->3) glycosidic bonds. All hydroxyl groups are protected as acetate (OAc) esters. The anomeric carbons are linked to an SMMTr group.

<sup>1</sup>H NMR spectrum (CDCl<sub>3</sub>) of compound **15**. The x-axis represents the chemical shift in ppm (f1), ranging from 0 to 8. The y-axis represents intensity. The spectrum shows several characteristic peaks for the structure, including anomeric protons (7.3 ppm), acetoxy methyl protons (2.3 ppm), and various sugar protons (3.0-5.5 ppm). Integration values are provided below the baseline, and a list of chemical shifts is shown at the top.

Chemical shifts (ppm): 7.3970, 7.3896, 7.3783, 7.3074, 7.3060, 7.2921, 7.2878, 7.2782, 7.2768, 6.8046, 5.7492, 5.7395, 5.4541, 5.4446, 5.4140, 5.3978, 5.3814, 5.3706, 5.3599, 5.3496, 5.0789, 5.0362, 5.0252, 5.0287, 5.0185, 5.0134, 5.0102, 4.9628, 3.9995, 3.9888, 3.9854, 3.9788, 3.9747, 3.9643, 3.9547, 3.9500, 3.9450, 3.9395, 3.9345, 3.9295, 3.9245, 3.9195, 3.9145, 3.9095, 3.9045, 3.8995, 3.8945, 3.8895, 3.8845, 3.8795, 3.8745, 3.8695, 3.8645, 3.8595, 3.8545, 3.8495, 3.8445, 3.8395, 3.8345, 3.8295, 3.8245, 3.8195, 3.8145, 3.8095, 3.8045, 3.7995, 3.7945, 3.7895, 3.7845, 3.7795, 3.7745, 3.7695, 3.7645, 3.7595, 3.7545, 3.7495, 3.7445, 3.7395, 3.7345, 3.7295, 3.7245, 3.7195, 3.7145, 3.7095, 3.7045, 3.6995, 3.6945, 3.6895, 3.6845, 3.6795, 3.6745, 3.6695, 3.6645, 3.6595, 3.6545, 3.6495, 3.6445, 3.6395, 3.6345, 3.6295, 3.6245, 3.6195, 3.6145, 3.6095, 3.6045, 3.5995, 3.5945, 3.5895, 3.5845, 3.5795, 3.5745, 3.5695, 3.5645, 3.5595, 3.5545, 3.5495, 3.5445, 3.5395, 3.5345, 3.5295, 3.5245, 3.5195, 3.5145, 3.5095, 3.5045, 3.4995, 3.4945, 3.4895, 3.4845, 3.4795, 3.4745, 3.4695, 3.4645, 3.4595, 3.4545, 3.4495, 3.4445, 3.4395, 3.4345, 3.4295, 3.4245, 3.4195, 3.4145, 3.4095, 3.4045, 3.3995, 3.3945, 3.3895, 3.3845, 3.3795, 3.3745, 3.3695, 3.3645, 3.3595, 3.3545, 3.3495, 3.3445, 3.3395, 3.3345, 3.3295, 3.3245, 3.3195, 3.3145, 3.3095, 3.3045, 3.2995, 3.2945, 3.2895, 3.2845, 3.2795, 3.2745, 3.2695, 3.2645, 3.2595, 3.2545, 3.2495, 3.2445, 3.2395, 3.2345, 3.2295, 3.2245, 3.2195, 3.2145, 3.2095, 3.2045, 3.1995, 3.1945, 3.1895, 3.1845, 3.1795, 3.1745, 3.1695, 3.1645, 3.1595, 3.1545, 3.1495, 3.1445, 3.1395, 3.1345, 3.1295, 3.1245, 3.1195, 3.1145, 3.1095, 3.1045, 3.0995, 3.0945, 3.0895, 3.0845, 3.0795, 3.0745, 3.0695, 3.0645, 3.0595, 3.0545, 3.0495, 3.0445, 3.0395, 3.0345, 3.0295, 3.0245, 3.0195, 3.0145, 3.0095, 3.0045, 2.9995, 2.9945, 2.9895, 2.9845, 2.9795, 2.9745, 2.9695, 2.9645, 2.9595, 2.9545, 2.9495, 2.9445, 2.9395, 2.9345, 2.9295, 2.9245, 2.9195, 2.9145, 2.9095, 2.9045, 2.8995, 2.8945, 2.8895, 2.8845, 2.8795, 2.8745, 2.8695, 2.8645, 2.8595, 2.8545, 2.8495, 2.8445, 2.8395, 2.8345, 2.8295, 2.8245, 2.8195, 2.8145, 2.8095, 2.8045, 2.7995, 2.7945, 2.7895, 2.7845, 2.7795, 2.7745, 2.7695, 2.7645, 2.7595, 2.7545, 2.7495, 2.7445, 2.7395, 2.7345, 2.7295, 2.7245, 2.7195, 2.7145, 2.7095, 2.7045, 2.6995, 2.6945, 2.6895, 2.6845, 2.6795, 2.6745, 2.6695, 2.6645, 2.6595, 2.6545, 2.6495, 2.6445, 2.6395, 2.6345, 2.6295, 2.6245, 2.6195, 2.6145, 2.6095, 2.6045, 2.5995, 2.5945, 2.5895, 2.5845, 2.5795, 2.5745, 2.5695, 2.5645, 2.5595, 2.5545, 2.5495, 2.5445, 2.5395, 2.5345, 2.5295, 2.5245, 2.5195, 2.5145, 2.5095, 2.5045, 2.4995, 2.4945, 2.4895, 2.4845, 2.4795, 2.4745, 2.4695, 2.4645, 2.4595, 2.4545, 2.4495, 2.4445, 2.4395, 2.4345, 2.4295, 2.4245, 2.4195, 2.4145, 2.4095, 2.4045, 2.3995, 2.3945, 2.3895, 2.3845, 2.3795, 2.3745, 2.3695, 2.3645, 2.3595, 2.3545, 2.3495, 2.3445, 2.3395, 2.3345, 2.3295, 2.3245, 2.3195, 2.3145, 2.3095, 2.3045, 2.2995, 2.2945, 2.2895, 2.2845, 2.2795, 2.2745, 2.2695, 2.2645, 2.2595, 2.2545, 2.2495, 2.2445, 2.2395, 2.2345, 2.2295, 2.2245, 2.2195, 2.2145, 2.2095, 2.2045, 2.1995, 2.1945, 2.1895, 2.1845, 2.1795, 2.1745, 2.1695, 2.1645, 2.1595, 2.1545, 2.1495, 2.1445, 2.1395, 2.1345, 2.1295, 2.1245, 2.1195, 2.1145, 2.1095, 2.1045, 2.0995, 2.0945, 2.0895, 2.0845, 2.0795, 2.0745, 2.0695, 2.0645, 2.0595, 2.0545, 2.0495, 2.0445, 2.0395, 2.0345, 2.0295, 2.0245, 2.0195, 2.0145, 2.0095, 2.0045, 1.9995, 1.9945, 1.9895, 1.9845, 1.9795, 1.9745, 1.9695, 1.9645, 1.9595, 1.9545, 1.9495, 1.9445, 1.9395, 1.9345, 1.9295, 1.9245, 1.9195, 1.9145, 1.9095, 1.9045, 1.8995, 1.8945, 1.8895, 1.8845, 1.8795, 1.8745, 1.8695, 1.8645, 1.8595, 1.8545, 1.8495, 1.8445, 1.8395, 1.8345, 1.8295, 1.8245, 1.8195, 1.8145, 1.8095,

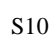

# <sup>1</sup>H NMR and <sup>13</sup>C NMR spectra of compound 2

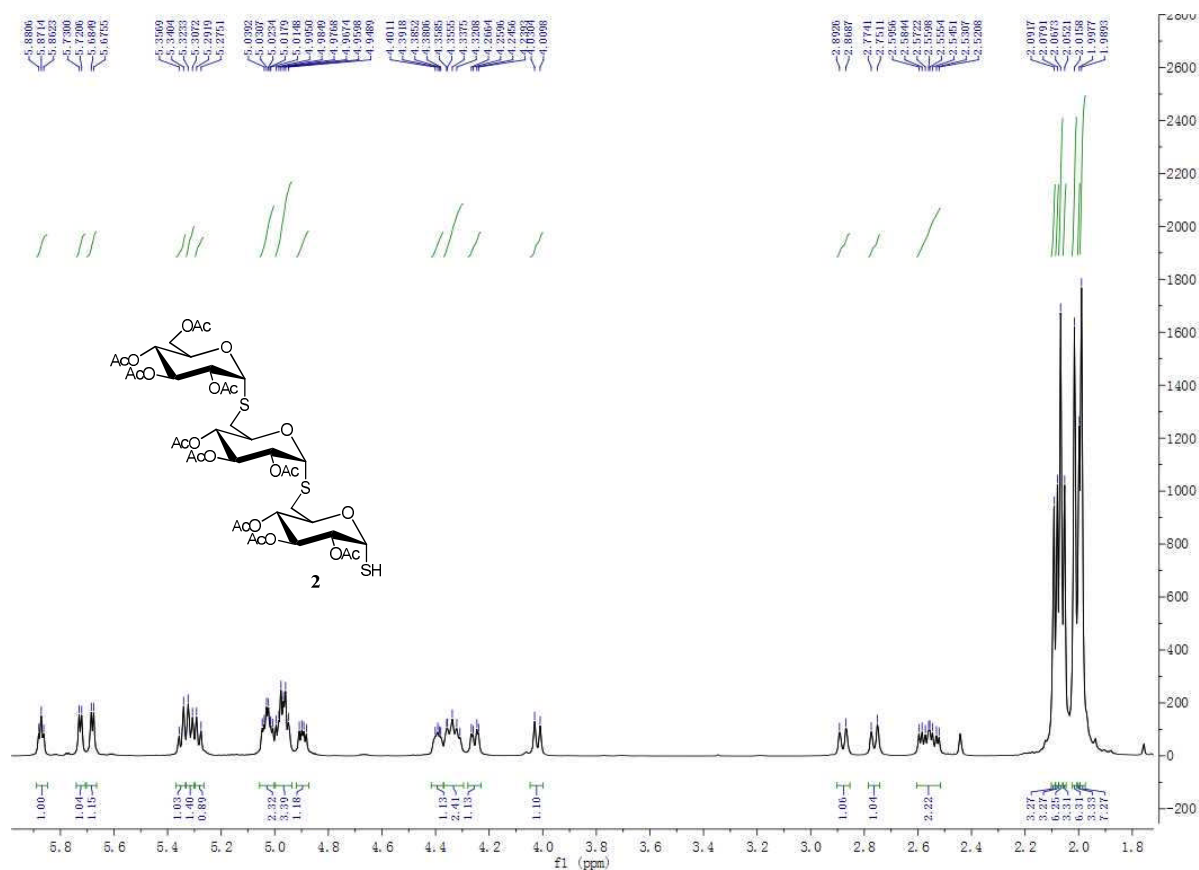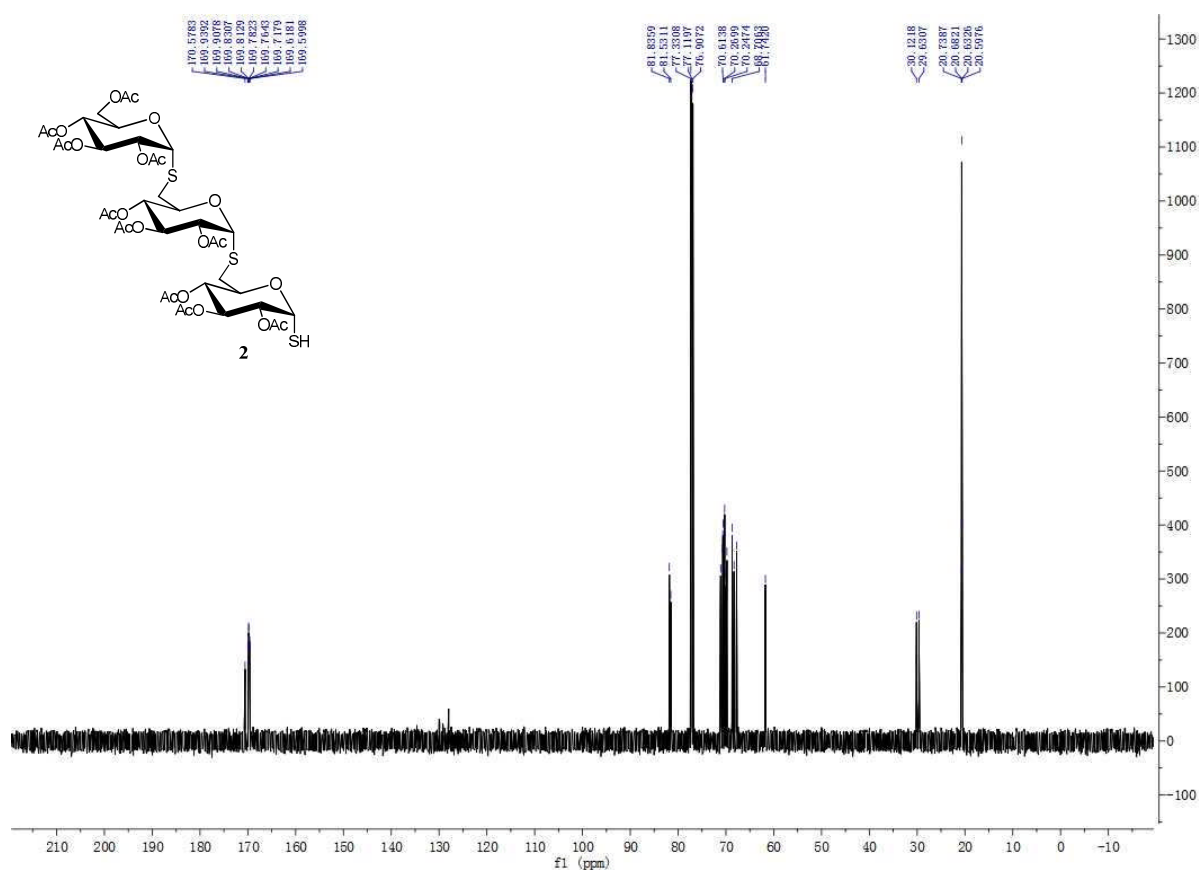

# <sup>1</sup>H NMR and <sup>13</sup>C NMR spectra of compound 6

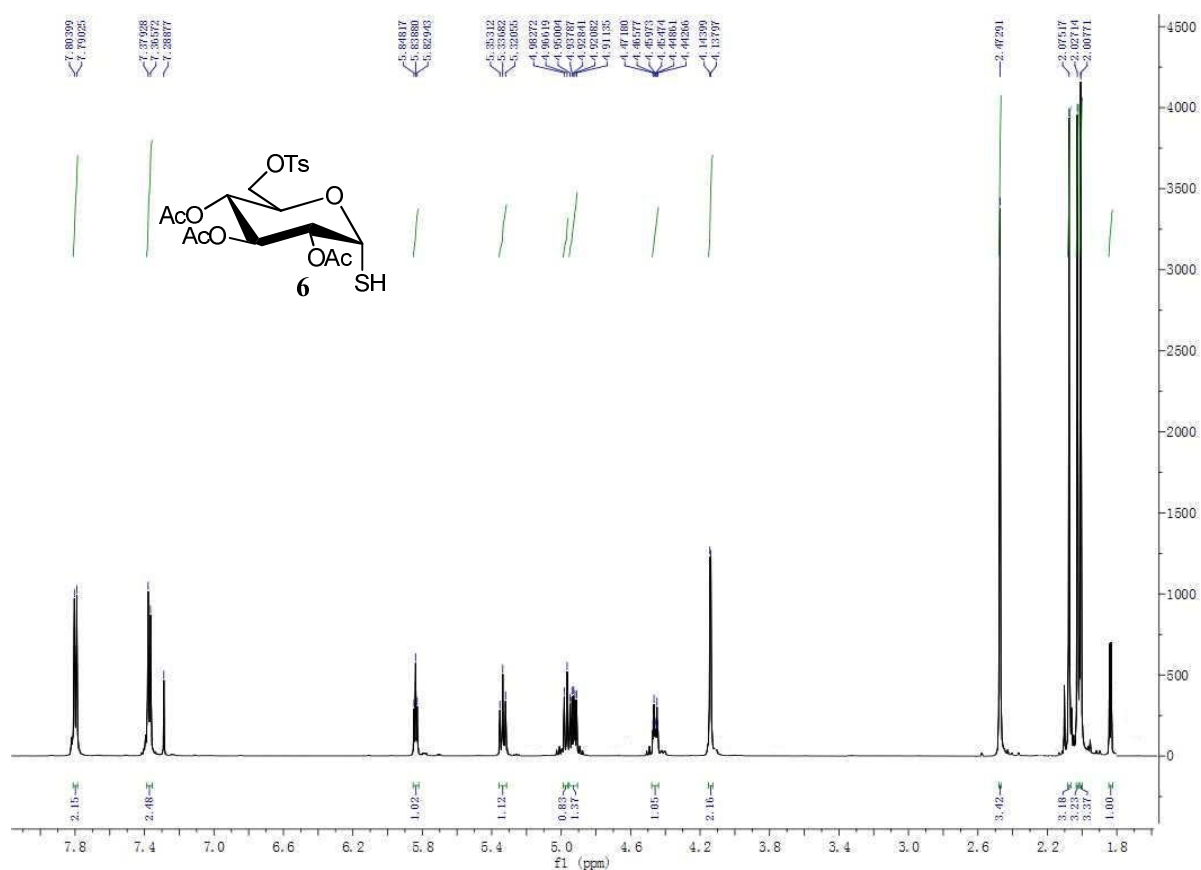

# <sup>1</sup>H NMR and <sup>13</sup>C NMR spectra of compound 16

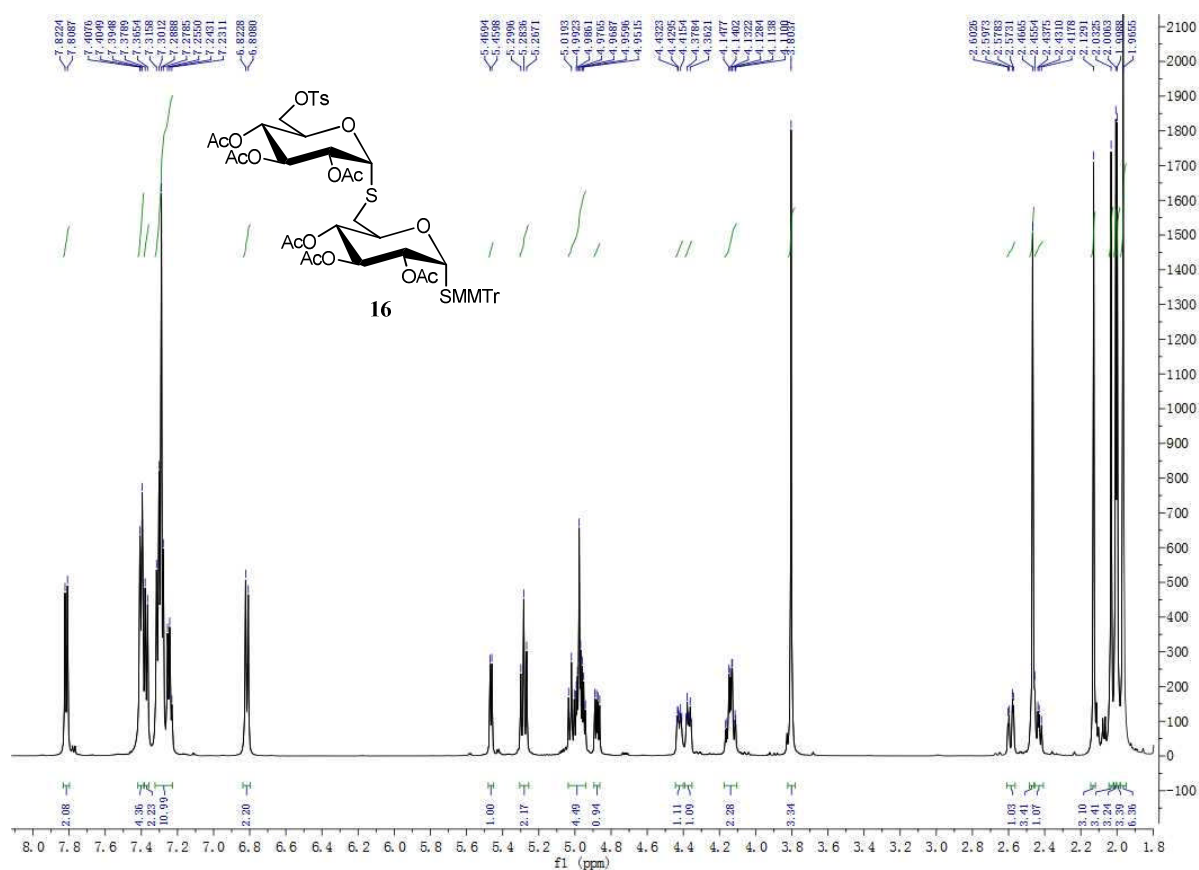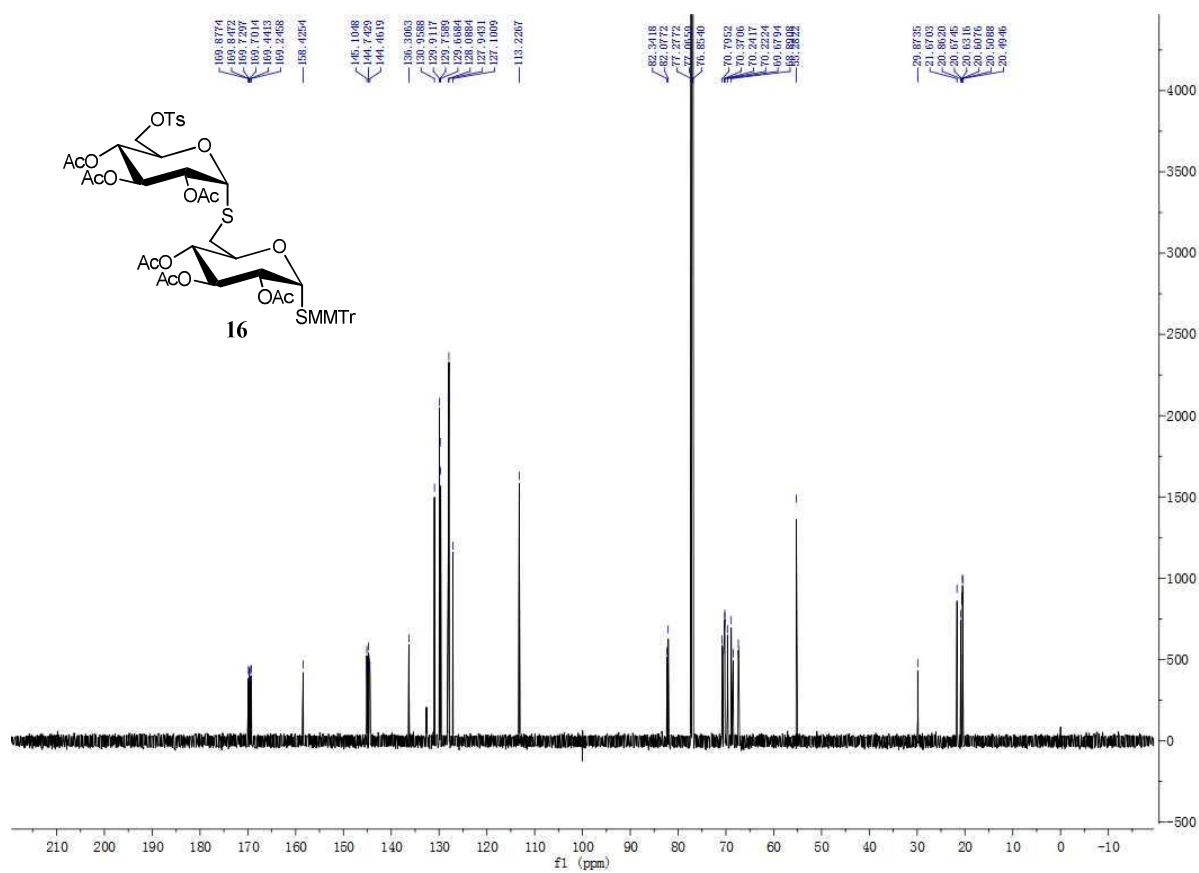

**Chemical structure of compound 3:**

CC(=O)OC1C(OC(=O)C)OC(OC(=O)C)C1S[C@@H]2C(OC(=O)C)OC(OC(=O)C)C2

**<sup>1</sup>H NMR spectrum (CDCl<sub>3</sub>):**

**Peak list (ppm):** 7.4238, 7.4134, 7.4012, 7.3770, 7.3575, 7.3221, 7.3157, 7.3035, 7.2890, 7.2804, 6.8269, 5.5260, 5.5255, 5.3037, 5.3475, 5.3310, 5.2652, 4.9152, 4.9062, 4.8553, 4.9067, 4.8987, 4.8952, 4.4241, 4.4178, 4.4135, 4.4079, 4.4018, 4.2275, 4.2184, 4.2148, 4.2148, 4.2148, 4.2023, 4.1981, 3.8186, 3.3404, 3.3362, 3.3220, 3.3179, 3.3137, 3.2995, 3.2919, 3.1966, 3.1836, 2.8160, 2.8107, 2.7911, 2.7859, 2.5663, 2.5611, 2.5414, 2.5342, 2.1219, 2.0781, 2.0597, 2.0211, 2.0211, 1.9316.

**Integration values:** 4.36, 11.22, 2.19, 1.00, 1.10, 1.10, 1.13, 1.02, 1.02, 3.07, 1.02, 1.04, 1.00, 1.02, 3.01, 3.42, 3.41, 3.04, 2.99.

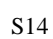



Chemical structure of compound 17 is shown above the spectrum. The structure is a branched oligosaccharide with four pyranose rings and one furanose ring, all with acetoxy (OAc) protecting groups. The label "17" and "SMMTr" are present below the structure.

<sup>1</sup>H NMR spectrum (CDCl<sub>3</sub>) of compound 17. The x-axis represents the chemical shift in ppm (f1), ranging from 2.0 to 7.5. The y-axis represents the intensity. The spectrum shows several peaks, with the most prominent ones in the anomeric region (4.5-5.5 ppm) and the acetoxy methyl region (2.0-2.5 ppm). Integration values are provided below the baseline.

Integration values (from left to right): 4.40, 10.37, 2.11, 2.00, 1.00, 0.94, 1.10, 1.10, 1.14, 1.46, 2.13, 2.09, 1.07, 1.47, 4.07, 1.13, 1.08, 3.05, 0.65, 0.90, 1.15, 1.06, 3.25, 1.11, 5.78, 2.38, 3.16, 2.90, 5.90, 3.31, 3.08, 3.15, 3.05, 2.78.

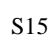

[illegible]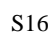

Supplement: c4ob01094a1.pdf [file c4ob01094a1.pdf]
